# Supplementary material for: Extended in vitro culture of human embryos demonstrates the complex nature of diagnosing chromosomal mosaicism from a single trophectoderm biopsy
Source: Oxford University Press journal article supplement (doi:10.1093/humrep/dez012), 2019-01-31
Supplement: dez012_supplementary_figure_s2.pdf [file dez012_supplementary_figure_s2.pdf]

### A Embryo PGT4

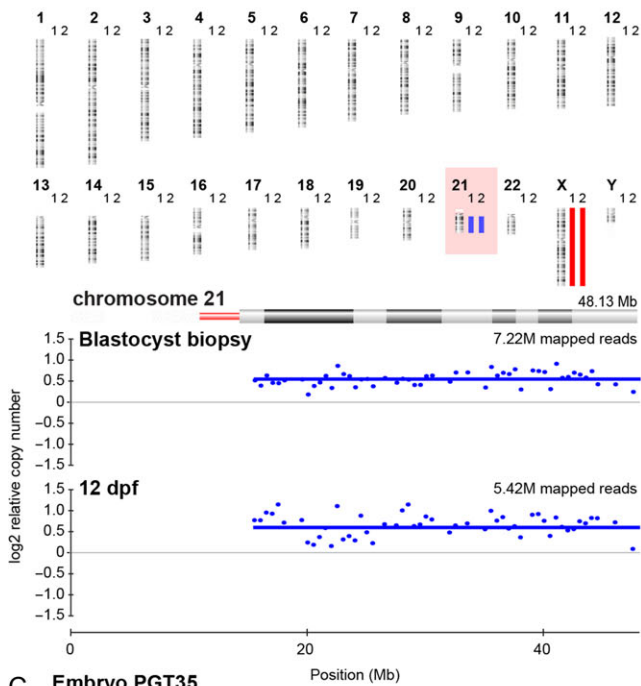

### B Embryo PGT1

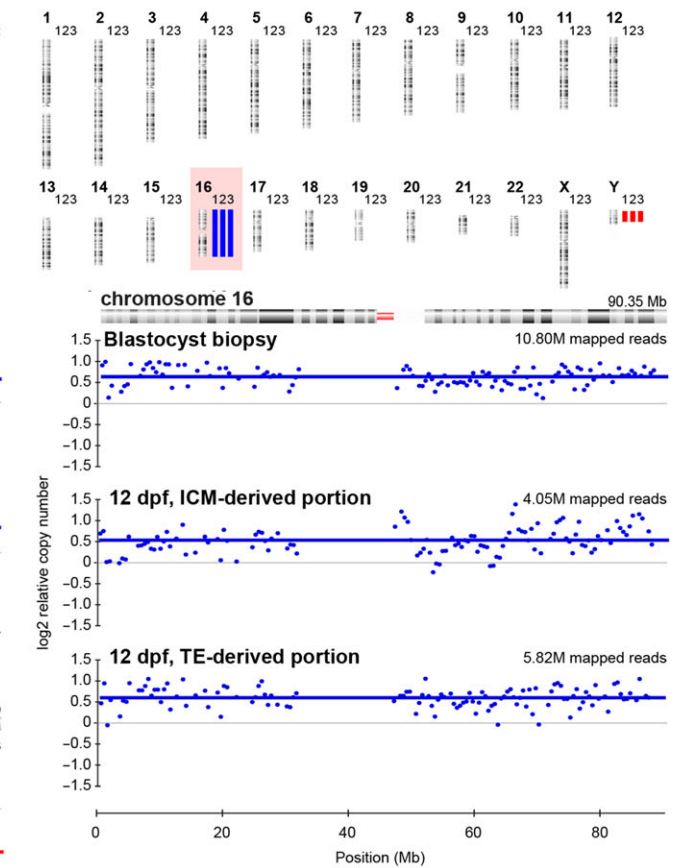

### C Embryo PGT35

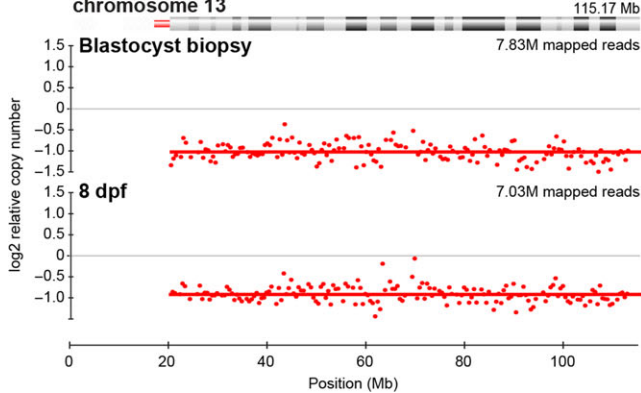

**Supplementary Figure S2 Concordance between uniform aberrations detected at the blastocyst stage and 8 and 12 days post-fertilisation (dpf).** Blue bars indicate duplications, red bars indicate deletions. M = million (**A**) Results for embryo PGT4. 1 = Blastocyst profile, 2 = 12 dpf embryo outgrowth profile. Profiles for chromosome 21 show a uniform trisomy 21 detected at the blastocyst stage and at 12 dpf. (**B**) Results for embryo PGT1. 1 = Blastocyst profile, 2 = 12 dpf, inner cell mass (ICM)-derived embryo outgrowth portion. 3 = 12 dpf, trophectoderm (TE)-derived embryo outgrowth portion. Profiles for chromosome 16 show a uniform trisomy 16 detected at the blastocyst stage and at 12 dpf, in both ICM and TE-derived portions of the embryo outgrowth. (**C**) Profiles for chromosome 13, embryo PGT35, show a uniform monosomy 13 detected at the blastocyst stage and confirmed at 8 dpf.
