# Supplementary material for: Extended in vitro culture of human embryos demonstrates the complex nature of diagnosing chromosomal mosaicism from a single trophectoderm biopsy
Source: Oxford University Press journal article supplement (doi:10.1093/humrep/dez012), 2019-01-31
Supplement: dez012_supplementary_figure_s3.pdf [file dez012_supplementary_figure_s3.pdf]

**A Embryo PGT22**

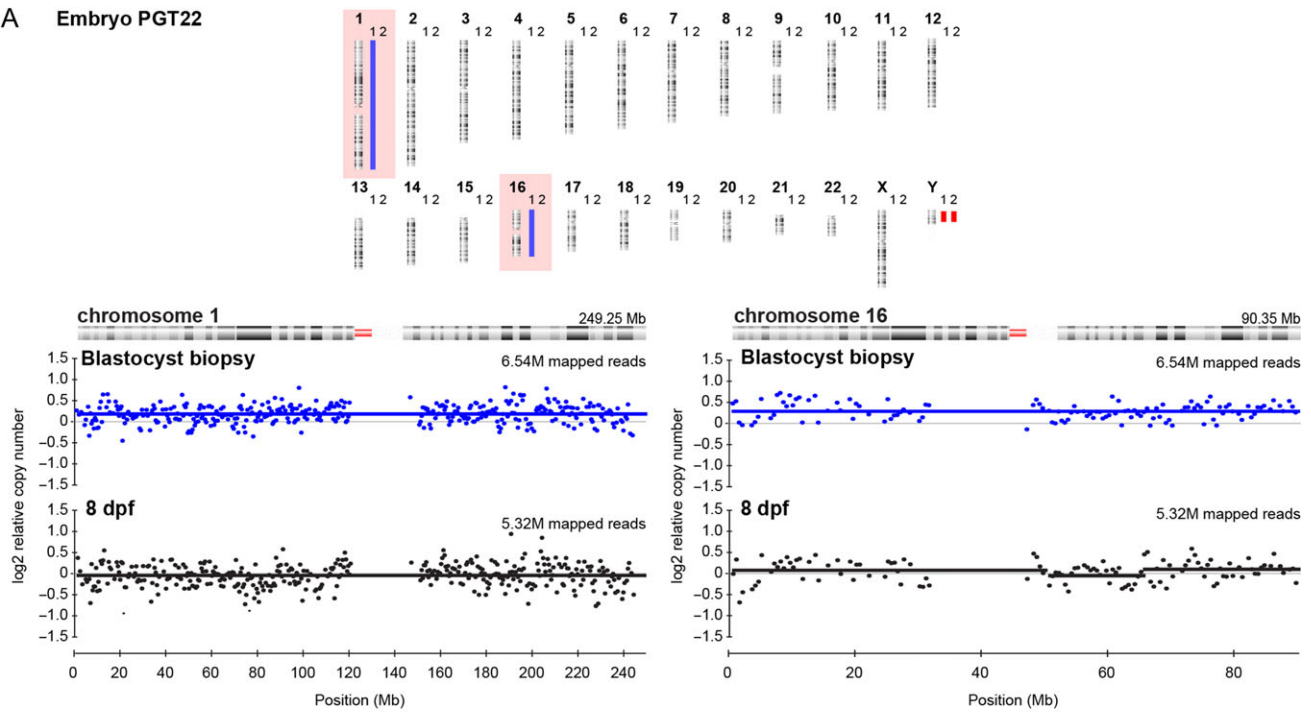

**B**

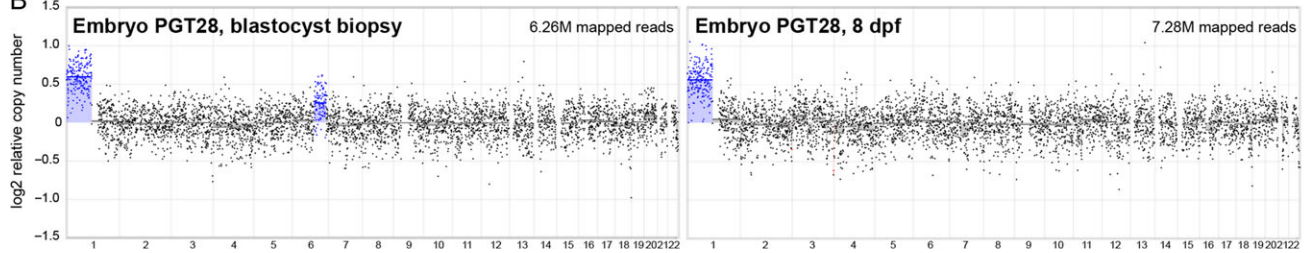

**Supplementary Figure S3 Blastocyst diagnosed with chromosomal mosaicism, presented with euploid profiles as early as 8 days post-fertilisation (dpf).** M = million (A) Results for embryo PGT22, showing both a mosaic trisomy 1 and mosaic trisomy 16. 1 = Blastocyst profile, 2 = 12 dpf, embryo outgrowth profile. Profiles for both chromosomes 1 and 16, reveal euploid profiles at 8 dpf. (B) Line graph sequencing results for embryo PGT28. The blastocyst biopsy profile revealed a uniform 1.0 log<sub>2</sub> relative copy number in addition to a 55.5 Mb, 6q21q26 mosaic duplication. Only the uniform 118.5 Mb 1p36.33p12 duplication was detected at 8 dpf.
