# Supplementary material for: Extended in vitro culture of human embryos demonstrates the complex nature of diagnosing chromosomal mosaicism from a single trophectoderm biopsy
Source: Oxford University Press journal article supplement (doi:10.1093/humrep/dez012), 2019-01-31
Supplement: dez012_supplementary_figure_s4.pdf [file dez012_supplementary_figure_s4.pdf]

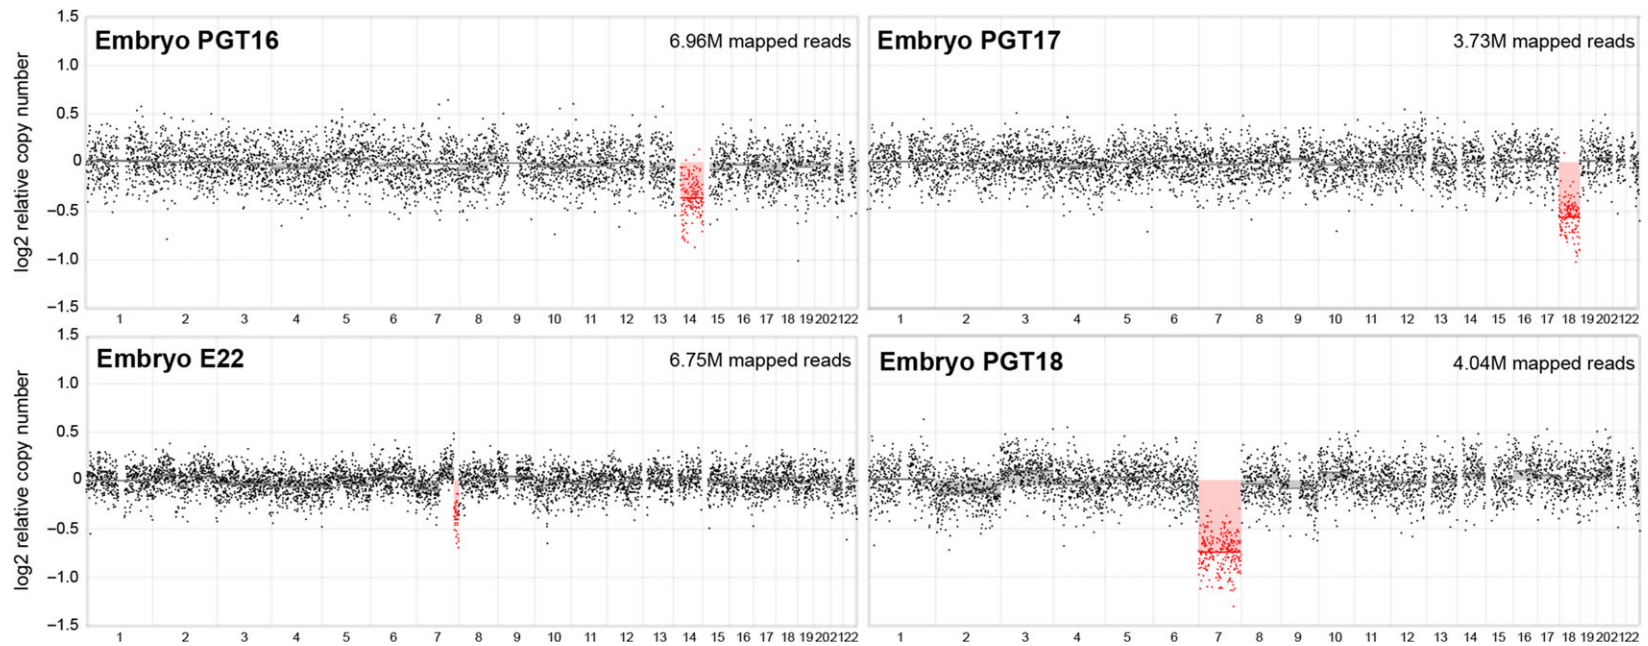

**Supplementary Figure S4 Embryos diagnosed with mosaic monosomies detached during culture, regardless of the degree of mosaicism originally reported.** Line graph sequencing results for embryo PGT16, reveal a mosaic monosomy 14 (~20%). Line graph sequencing results for embryo PGT17, reveal a mosaic monosomy 18 (~50%). Line graph sequencing results for embryo E22, reveal a mosaic 18.0 Mb, 7q34ter deletion (~30%). Line graph sequencing results for embryo PGT18, reveal a mosaic monosomy 7 (~65%). M = million
