# Supplementary material for: Extended in vitro culture of human embryos demonstrates the complex nature of diagnosing chromosomal mosaicism from a single trophectoderm biopsy
Source: Oxford University Press journal article supplement (doi:10.1093/humrep/dez012), 2019-01-31
Supplement: dez012_supplementary_figure_s5.pdf [file dez012_supplementary_figure_s5.pdf]

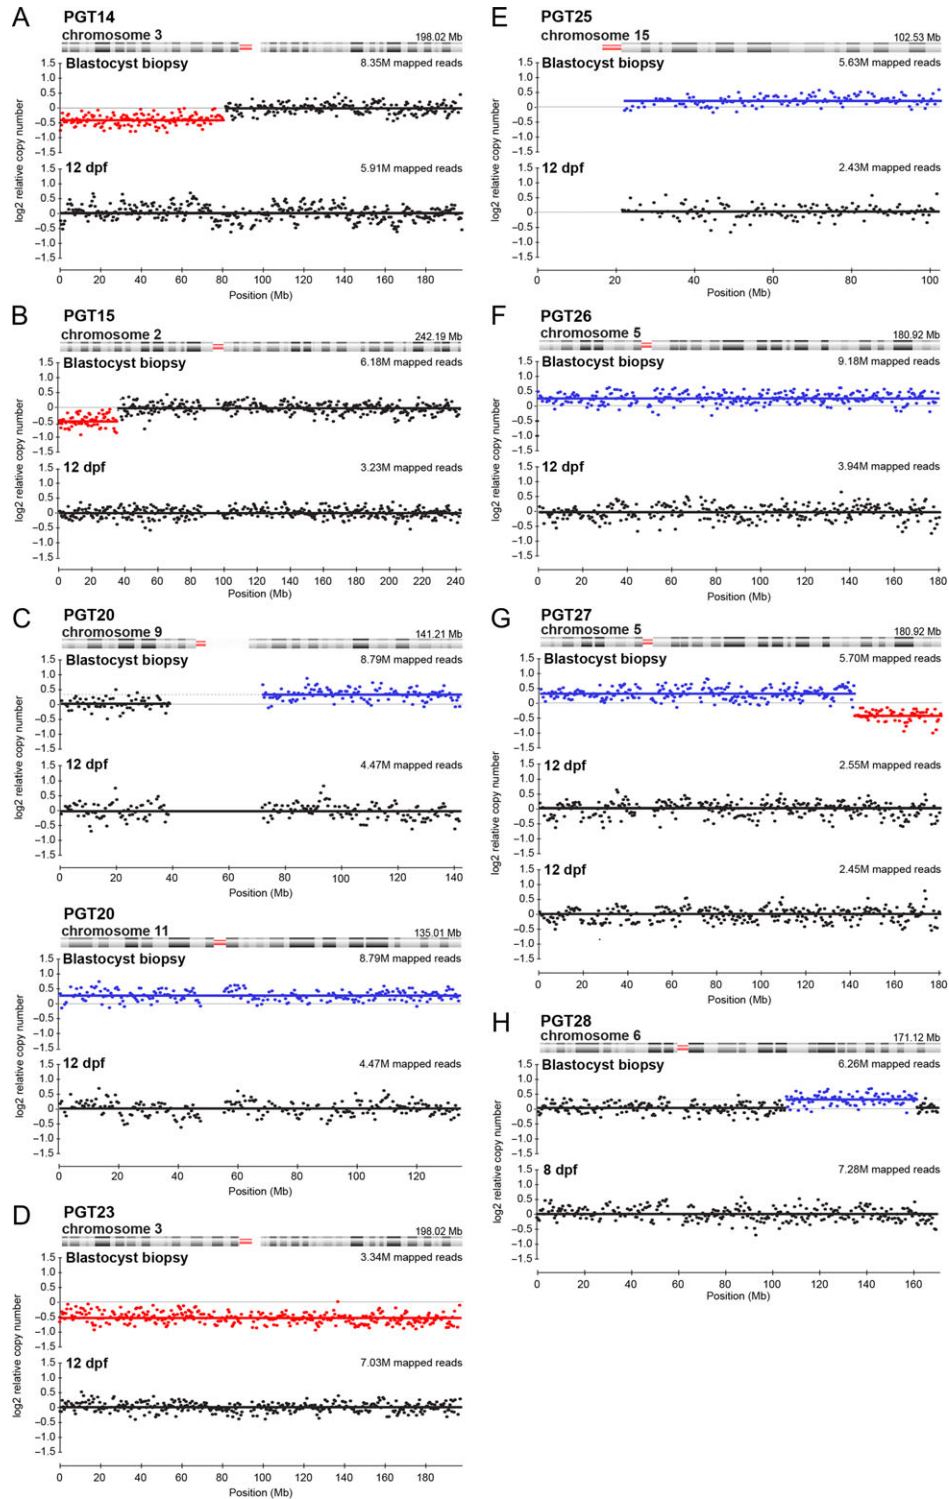

**Supplementary Figure S5 Overview of chromosomal profiles of embryos diagnosed as mosaic and respective outgrowths 8 and 12 days post-fertilisation (dpf).** Blue values indicate duplications, red values indicate deletions. M = million (**A**). Profiles for chromosome 3, embryo PGT14, reveal a mosaic 3p26.3p12.2, 80.5 Mb deletion at the blastocyst stage, while a euploid profile was observed at 12 dpf. (**B**) Profiles for chromosome 2, embryo PGT15, reveal a mosaic 2p25.3p22.3, 35.0 Mb deletion at the blastocyst stage, while a euploid profile was observed at 12 dpf. (**C**) Results for embryo PGT20. Profiles for chromosome 9 and chromosome 11 reveal a mosaic 9q21.11q34.3, 69.5 Mb duplication and a mosaic

---

trisomy 11 diagnosed at the blastocyst stage, while euploid profiles were observed at 12 dpf. **(D)** Profiles for chromosome 3, embryo PGT23, reveal a mosaic monosomy 3 at the blastocyst stage, while a euploid profile was observed for this chromosome at 12 dpf. **(E)** Profiles for chromosome 15, embryo PGT25, reveal a mosaic trisomy 15 at the blastocyst stage, while a euploid profile was observed for this chromosome at 12 dpf. **(F)** Profiles for chromosome 5, embryo PGT26, reveal a mosaic trisomy 5 at the blastocyst stage, while a euploid profile was observed for this chromosome at 12 dpf. **(G)** Profiles for chromosome 5, embryo PGT27, reveal a mosaic 5p15.33q31.3, 141.0 Mb duplication in addition to a mosaic 5q31.3q35.3, 39.0 Mb deletion diagnosed at the blastocyst stage, while euploid profiles were observed for this chromosome in both ICM and TE-derived portions of the embryo outgrowth at 12 dpf. **(H)** Profiles for chromosome 6, embryo PGT28, reveal a mosaic 6q21q26, 55.5 Mb duplication at the blastocyst stage, while a euploid profile was observed for this chromosome at 8 dpf.
